# Supplementary material
Source: PubMed Central journal article supplement (PMC3487108)
Supplement: NIHMS346588-supplement-01.pdf [file NIHMS346588-supplement-01.pdf]

## **Supplemental Information**

### **Direct Signaling between Platelets and Cancer Cells Induces an Epithelial-Mesenchymal-Like Transition and Promotes Metastasis**

Myriam Labelle, Shahinoor Begum, and Richard O. Hynes

#### **Inventory of Supplemental Information**

**Figure S1, related to Figure 1**

**Table S1, related to Figure 2. Provided as an Excel File.**

**Table S2, related to Figure 2**

**Figure S2, related to Figure 3**

**Table S3, related to Figure 3**

**Figure S3, related to Figure 4**

**Table S4, related to Figure 4**

**Figure S4, related to Figure 6**

**Supplemental Experimental Procedures**

SUPPLEMENTAL INFORMATION

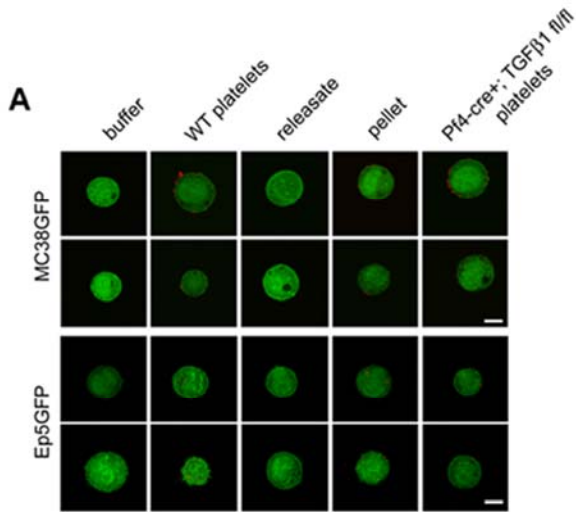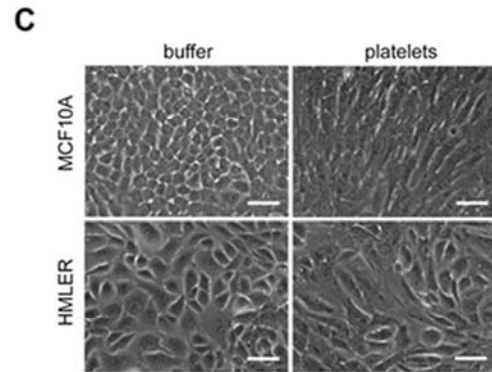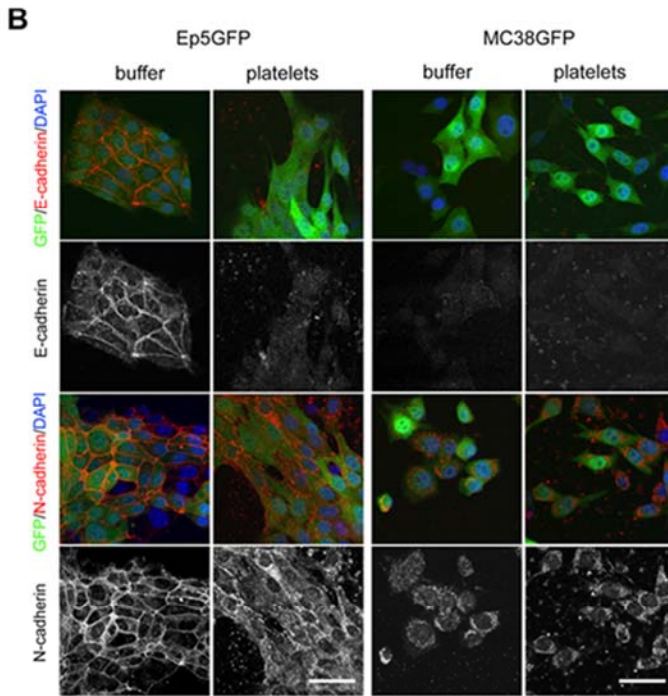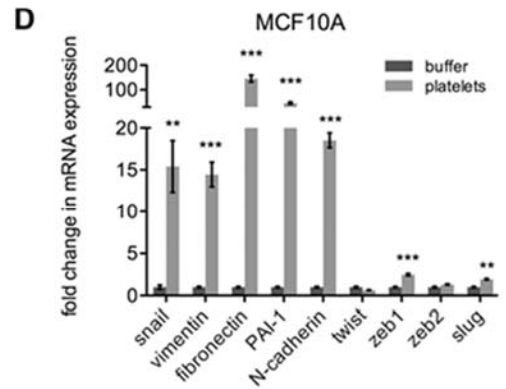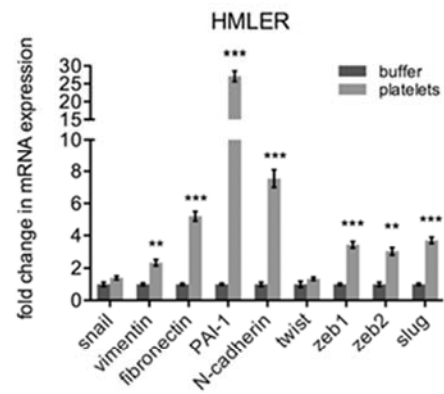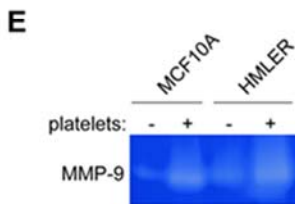

**Figure S1, related to Figure 1. Pretreatment of Tumor Cells with Platelets Induces an EMT-Like Phenotype in Mouse and Human Cell Lines.**

(A) Immunofluorescence staining for platelets (CD41;red) in cell suspension (prepared as for tail-vein injection) of MC38GFP or Ep5 cells stably expressing GFP. Two representative cells for each condition are shown. Note that very few platelets remain attached to tumor cells treated with platelets or the platelet pellet fraction from WT mice, or with platelets from *Pf4-cre<sup>+</sup>*; *TGFβ1<sup>fl/fl</sup>* mice. Scale bar=10μm.

(B) Immunofluorescence stainings for E-cadherin and N-cadherin (red) in MC38GFP cells or Ep5 cells stably expressing GFP treated with buffer or platelets for 40h. Scale bar=50μm.

(C) Phase-contrast micrographs of MCF10A or HMLER cells treated with buffer or platelets for 24h. Scale bar=50μm.

(D) Relative fold change in mRNA expression in human breast epithelial MCF10A or HMLER human cells treated with buffer or platelets for 40h (n=3). Values are normalized to *GAPDH* expression. Bars represent the mean ± SEM. \*\*p<0.01, \*\*\*p<0.001 were determined by Student's t-test.

(E) Zymography for MMP-9 in the conditioned medium of MCF10A or HMLER human cells treated as in (D).

**Table S1, related to Figure 2. List of Genes Modulated by More than 2 Fold in Ep5 Cells upon Exposure to Platelets (p<0.05) (Provided as an Excel File)**

**Table S2, related to Figure 2. List of Genes Modulated by More than 4 fold in Ep5 Cells upon Exposure to Platelets (p<0.05)**

| Gene Symbol   | Log2 fold change | P value     |
|---------------|------------------|-------------|
| 1700112C13Rik | 2.098184         | 1.60E-08    |
| 4930572J05Rik | -3.766710667     | 2.01E-05    |
| 9330175M20Rik | -2.024273333     | 0.000366637 |
| Aldh3a1       | -3.059570667     | 1.60E-05    |
| Ankrd22       | -2.472888667     | 3.88E-06    |
| Arg2          | -2.04233         | 4.25E-05    |
| Atp13a4       | -3.085166        | 1.98E-08    |
| Atp8b1        | -2.33801         | 0.002798052 |
| Bhlhe40       | 2.119186667      | 1.36E-08    |
| Bhlhe41       | -2.822264667     | 3.12E-05    |
| C1qtnf1       | 2.86726          | 2.56E-10    |
| Ccl2          | 3.415371333      | 0.000501074 |
| Chst2         | 2.286672667      | 1.05E-08    |
| Cldn1         | -2.493964667     | 3.62E-08    |
| Clu           | 2.452976667      | 1.82E-09    |
| Ctsw          | 5.22753          | 3.26E-11    |
| Cxcl5         | -2.299436667     | 0.001381252 |
| Edn1          | 2.325914667      | 1.57E-05    |
| Eya2          | -2.221118667     | 5.07E-07    |
| Fermt1        | 2.084543333      | 9.63E-10    |
| Fn1           | 2.147283333      | 4.66E-07    |
| Gm1006        | -3.230466        | 1.20E-07    |
| Gm14203       | -2.115369333     | 1.75E-09    |
| Gpr146        | -2.591415333     | 7.70E-05    |
| Gstt1         | -2.132094667     | 2.31E-06    |
| Id2           | -2.530128        | 0.000104486 |
| Irs1          | -2.202704        | 7.78E-07    |
| Jag1          | 2.010252         | 2.09E-06    |
| Klhl1         | 2.246299333      | 7.20E-06    |
| Klk6          | -3.232498667     | 3.42E-06    |
| Lrrc26        | -3.754262667     | 6.93E-08    |
| Mcpt8         | -2.434465333     | 2.93E-05    |
| Mgat3         | -2.665078667     | 0.000169619 |
| Mmp3          | -2.934538667     | 3.48E-06    |
| Mmp9          | 5.549030667      | 4.86E-11    |
| Mt2           | 3.137014         | 3.12E-05    |
| Mxd1          | -2.005537333     | 3.17E-09    |

---

|          |              |             |
|----------|--------------|-------------|
| Ncam1    | 3.060405333  | 2.89E-09    |
| Npnt     | -2.537079333 | 7.44E-06    |
| Nt5e     | 2.16121      | 2.99E-05    |
| Padi1    | -2.58373     | 4.09E-07    |
| Pdia5    | 2.178992     | 4.35E-05    |
| Ppl      | -2.346288    | 3.27E-05    |
| Rhpn2    | -2.334857333 | 3.05E-07    |
| Rom1     | -2.792601333 | 1.39E-06    |
| Serpinb2 | -2.026295333 | 0.003003047 |
| Serpine1 | 4.16097      | 4.47E-09    |
| Sgk2     | -3.672803333 | 1.48E-05    |
| Slc25a35 | -2.232655333 | 0.001304895 |
| Slc26a9  | -2.669384667 | 9.74E-06    |
| Slc44a3  | -3.123658    | 7.31E-05    |
| Styk1    | -2.362784    | 4.20E-06    |
| Tc2n     | -2.454634    | 0.000866249 |
| Tmem71   | -2.043573333 | 0.000126913 |
| Tns4     | -2.508330667 | 7.11E-09    |
| Vegfc    | 3.681836     | 1.39E-07    |
| Vim      | 2.430557333  | 0.0143674   |
| Wisp1    | 4.779488     | 9.59E-11    |

---

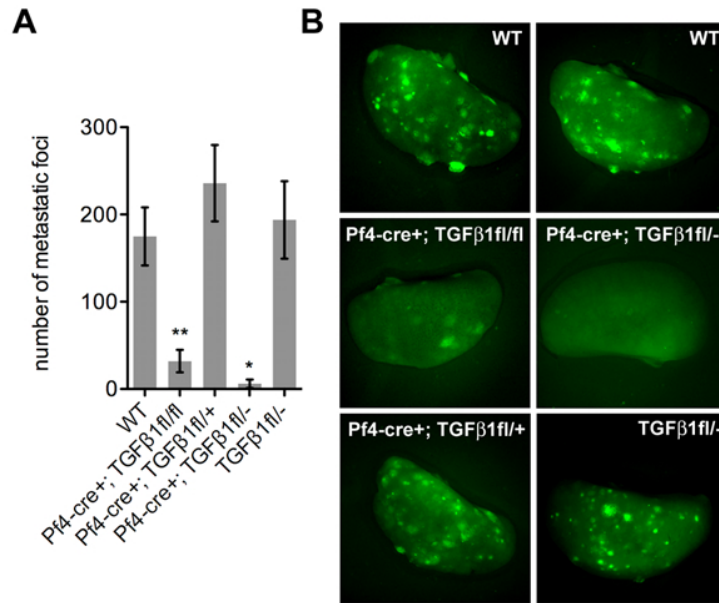

**Figure S2, related to Figure 3. *Stumpy* Deletion Does Not Affect Metastasis**

(A) Numbers of metastatic foci at the surface of lungs (2 largest lobes) 14 days after tail-vein injection of MC38GFP cells in wild-type (WT), *Pf4-cre<sup>+</sup>; TGFβ1<sup>fl/fl</sup>*, *Pf4-cre<sup>+</sup>; TGFβ1<sup>fl/+</sup>* mice, *Pf4-cre<sup>+</sup>; TGFβ1<sup>fl/-</sup>* mice or *TGFβ1<sup>fl/-</sup>* mice. Each bar represents the mean ± SEM of n=4-9.

\*p<0.05, \*\*p<0.01 vs WT were determined by one-way ANOVA followed by Tuckey's post test.

(B) Micrographs of lungs 14 days after tail-vein injection of MC38GFP cells in wild-type (WT), *Pf4-cre<sup>+</sup>; TGFβ1<sup>fl/fl</sup>*, *Pf4-cre<sup>+</sup>; TGFβ1<sup>fl/+</sup>* mice, *Pf4-cre<sup>+</sup>; TGFβ1<sup>fl/-</sup>* mice, or *TGFβ1<sup>fl/-</sup>* mice.

**Table S3, related to Figure 3. Bleeding Times and Platelet Counts**

| Genotype                                                    | Bleeding time<br>(s) | Platelet count<br>(10 <sup>6</sup> /μl) |
|-------------------------------------------------------------|----------------------|-----------------------------------------|
| WT                                                          | 176 ± 27 (n=18)      | 1.04 ± 0.05 (n=5)                       |
| <i>Pf4-cre</i> <sup>+</sup> ; <i>TGFβ1</i> <sup>fl/fl</sup> | 172 ± 37 (n=6)       | 1.11 ± 0.16 (n=4)                       |
| <i>Pf4-cre</i> <sup>+</sup> ; <i>TGFβ1</i> <sup>fl/+</sup>  | 187 ± 44 (n=5)       | 1.12 ± 0.09 (n=5)                       |
| <i>Pf4-cre</i> <sup>+</sup> ; <i>TGFβ1</i> <sup>fl/-</sup>  | 149 ± 19 (n=5)       | 1.19 ± 0.10 (n=2)                       |
| <i>TGFβ1</i> <sup>fl/-</sup>                                | 180 ± 28 (n=7)       | 0.76 ± 0.16 (n=4)                       |

Bleeding times and platelet counts ± SEM

**A**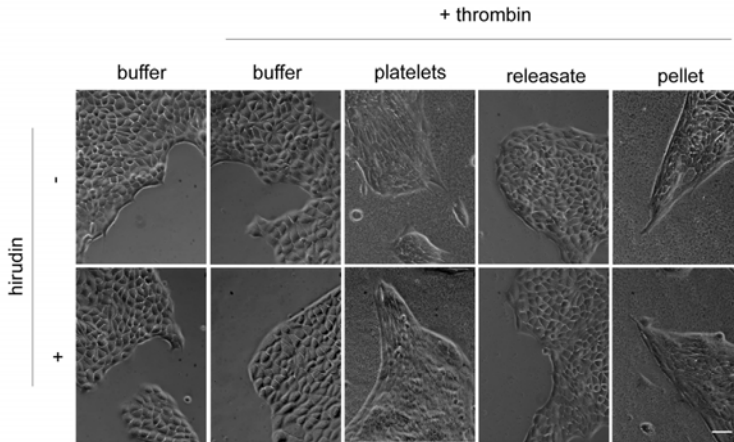**B**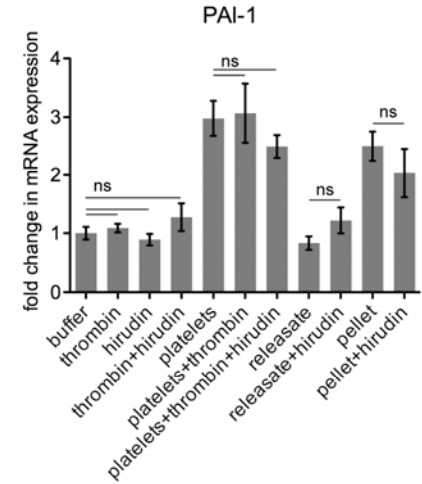**C**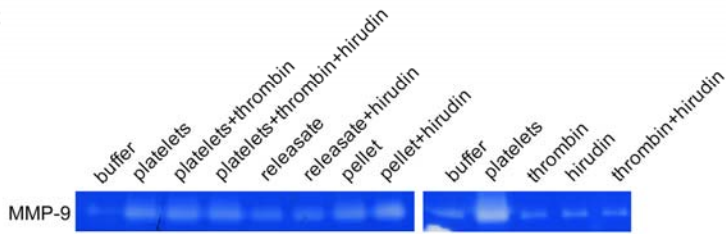**D**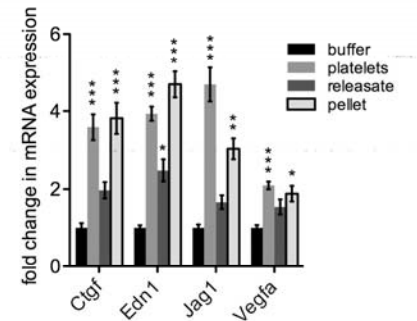**E**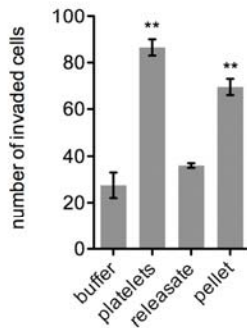**F**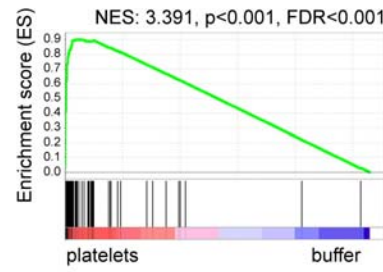**G**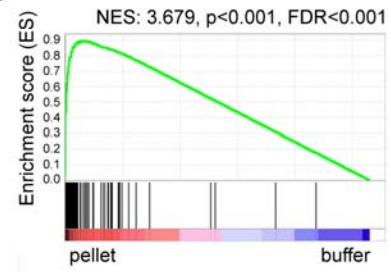**H**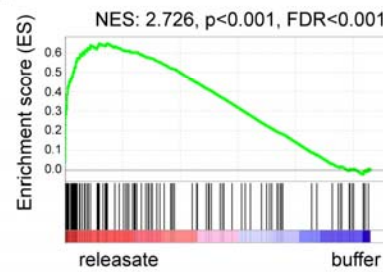**I**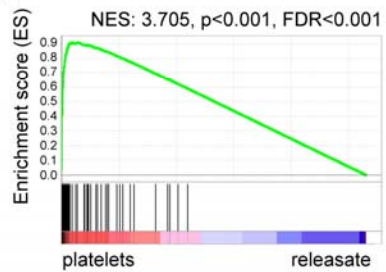



**Figure S3, related to Figure 4. Platelet-Derived TGF $\beta$ 1 and Platelet-Bound Factors Cooperate to Promote Metastasis**

(A) Phase-contrast micrographs of Ep5 cells treated with buffer, platelets, releasate from activated platelets (releasate), or the pellet fraction from activated platelets (pellet) +/- thrombin and hirudin for 24h. The releasate and pellet fractions were generated by treating platelets with thrombin (0.5U/ml) and separated by centrifugation. For some conditions, thrombin was blocked with hirudin (5U/ml) prior dilution in culture medium and co-incubation with the tumor cells. Scale bar=50 $\mu$ m.

(B) Relative fold change in *PAI-1* mRNA expression in Ep5 cells treated as in (A) for 40h (n=3). Values are normalized to *Gapdh* expression. ns (p>0.05) was determined by one-way ANOVA followed by Tuckey's post test.

(C) Zymography for MMP-9 in the conditioned medium of Ep5 cells treated as in (B).

(D) Relative fold change in mRNA expression in Ep5 cells treated with buffer, platelets, releasate from activated platelets (releasate), or the pellet fraction from activated platelets (pellet) (n=3). Values are normalized to *Gapdh* expression. Bars represent the mean  $\pm$  SEM, and \*p<0.05, \*\*p<0.01, \*\*\*p<0.001 vs buffer were determined by one-way ANOVA followed by Tuckey's post test.

(E) Ep5 cells were added at the top of transwells coated with Matrigel and treated with buffer, platelets, releasate from activated platelets (releasate), or the pellet fraction from activated platelets (pellet). The total numbers of cells that invaded to the bottom of the transwell were counted after 48h. Each bar represents the mean  $\pm$  SEM of n=2. \*\*p<0.01 vs buffer were determined by one-way ANOVA followed by Tuckey's post test.

(F-I) Enrichment plots for the platelet-induced gene signature (genes upregulated by more than 2 fold; Table S1) in an independent set of microarray data generated with Ep5 cells treated with

buffer, platelets, releasate from activated platelets (releasate), or the pellet fraction from activated platelets (pellet) (n=3). Enrichment in platelet-, platelet pellet- or releasate-treated cells versus untreated cells (buffer) are shown in F, G and H. Enrichment in the platelet-treated cells in comparison to the releasate-treated cells is presented in I. Each vertical black line represents a platelet-induced gene. The left-to-right position of each line indicates the relative position of the gene within the rank ordering of the 13,243 genes represented in the dataset from the gene most upregulated upon platelet treatment (position 1 on the left) to the most down-regulated (position 13,243 on the right). The genes near the middle are unaffected by the platelet treatment. The platelet-induced gene signature is clearly enriched in the platelet-treated Ep5 cells (E;  $p < 0.001$ ,  $FDR < 0.001$ ), as evidenced by the cluster of vertical black lines at the very left of the distribution and the positive enrichment score marked by the green line, validating the platelet-induced gene signature in this data set. Similarly, the gene signature is also highly enriched in the pellet-treated cells (F;  $p < 0.001$ ,  $FDR < 0.001$ ). Interestingly, while the platelet-induced gene signature is overall also enriched in releasate-treated cells (G;  $p < 0.001$ ,  $FDR < 0.001$ ), there is a subset of genes which are less affected by this treatment and are redistributed towards the right of the plot, suggesting that treatment with the releasate only induces partial gene expression changes in comparison to treatment with platelets in Ep5 cells. The overall lower magnitude of gene expression changes observed in the releasate-treated cells in comparison with platelet-treated cells is further illustrated by the enrichment of the platelet-induced gene signature in platelet-treated cells directly compared to releasate-treated cells (H;  $p < 0.001$ ,  $FDR < 0.001$ ). The NES (normalized enrichment score), p-value and FDR (false discovery rate) are indicated at the top of each plot.

**Table S4, related to Figure 4. Gene Set Enrichment Analysis (GSEA) for Ep5 Cells Treated with Platelets, Platelet Pellet or Platelet Releasate**

| Gene sets                                          | Platelets vs Buffer |                 |        | Pellet vs Buffer |                 |        | Releasate vs Buffer |                 |        |
|----------------------------------------------------|---------------------|-----------------|--------|------------------|-----------------|--------|---------------------|-----------------|--------|
|                                                    | NES                 | Nominal p-value | FDR    | NES              | Nominal p-value | FDR    | NES                 | Nominal p-value | FDR    |
| <b>EMT Signatures</b>                              |                     |                 |        |                  |                 |        |                     |                 |        |
| BLICK_EMT-SIG_UP                                   | 1.550               | 0.011           | 0.044  | 1.426            | 0.033           | 0.063  | -1.501              | 0.018           | 0.032  |
| TAUBE_EMT_UP                                       | 1.430               | 0.041           | 0.034  | 1.220            | 0.120           | 0.122  | 1.024               | 0.414           | 0.411  |
| TAUBE_EMT_DN                                       | -1.937              | <0.001          | 0.002  | -1.929           | <0.001          | <0.001 | -1.968              | <0.001          | <0.001 |
| ONDER_CDH1_TARGETS_2_UP                            | 1.470               | 0.004           | 0.001  | 1.350            | 0.010           | 0.010  | 1.093               | 0.240           | 0.275  |
| ONDER_CDH1_TARGETS_2_DN                            | -1.897              | <0.001          | 0.003  | -1.863           | <0.001          | <0.001 | -2.058              | <0.001          | 0.002  |
| <b>TGFβ Signatures</b>                             |                     |                 |        |                  |                 |        |                     |                 |        |
| GIAMPIERI_TGFB_UP                                  | 2.194               | <0.001          | <0.001 | 1.856            | <0.001          | <0.001 | -1.103              | 0.229           | 0.221  |
| GIAMPIERI_TGFB_DN                                  | -2.583              | <0.001          | <0.001 | -2.466           | <0.001          | <0.001 | -1.789              | <0.001          | <0.001 |
| VALCOURT_TGFB_UP                                   | 1.976               | <0.001          | 0.002  | 1.390            | 0.046           | 0.039  | -1.498              | 0.013           | 0.059  |
| VALCOURT_TGFB_DN                                   | -2.130              | <0.001          | <0.001 | -2.162           | <0.001          | <0.001 | -1.725              | 0.005           | 0.037  |
| <b>Cancer Stem Cell Signatures</b>                 |                     |                 |        |                  |                 |        |                     |                 |        |
| CREIGHTON_CSC_UP                                   | 1.570               | 0.004           | 0.001  | 1.380            | 0.028           | 0.021  | 1.060               | 0.336           | 0.313  |
| CREIGHTON_CSC_DN                                   | -1.480              | 0.004           | 0.006  | -1.540           | <0.001          | 0.002  | -1.240              | 0.063           | 0.084  |
| <b>Tumor progression and Metastasis Signatures</b> |                     |                 |        |                  |                 |        |                     |                 |        |
| VANTVEER_BREAST_CANCER_POOR_PROGNOSIS              | 1.762               | 0.004           | 0.012  | 1.721            | 0.005           | 0.005  | 1.247               | 0.155           | 0.361  |
| JAEGER_METASTASIS_UP                               | 1.790               | 0.006           | 0.010  | 1.663            | 0.010           | 0.006  | 1.273               | 0.140           | 0.086  |
| <b>NF-κB Signatures</b>                            |                     |                 |        |                  |                 |        |                     |                 |        |
| HINATA_NFKB_TARGETS_KERATINOCYTE_UP                | 1.552               | 0.012           | 0.046  | 1.377            | 0.034           | 0.074  | -1.499              | 0.026           | 0.034  |
| SANA_TNF_SIGNALING_UP                              | 1.672               | 0.007           | 0.023  | 1.840            | <0.001          | <0.001 | -1.290              | 0.083           | 0.150  |

Enrichment of gene sets from the literature. Positive normalized enrichment score (NES) indicates enrichment in either platelet-, pellet- or releasate-treated Ep5 cells; negative NES indicates enrichment in untreated Ep5 cells (buffer). FDR (false discovery rate). NF- $\kappa$ B signatures are enriched in platelet- or pellet-treated Ep5 cells, but not in releasate-treated Ep5 cells (note the negative NES for releasate-treated cells), suggesting a dependence on platelet-bound factors for activation of this pathway. Similarly, while genes upregulated during EMT, upon TGF $\beta$  treatment, in cancer stem cells or during tumor progression and metastasis are significantly enriched in platelet- or pellet-treated cells ( $p < 0.05$  and/or  $FDR < 0.25$ ), this enrichment is not observed in releasate-treated cells ( $p > 0.05$  and/or  $FDR > 0.25$ ). However, genes downregulated upon TGF $\beta$  treatment and during EMT are significantly depleted upon all three treatments, suggesting that partial TGF $\beta$  and EMT responses are maintained in releasate-treated cells.

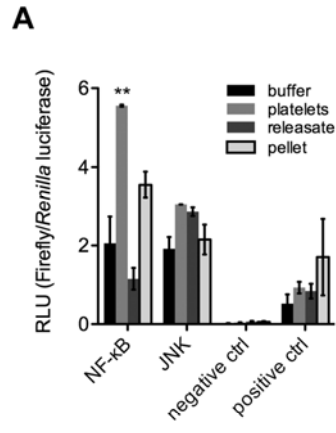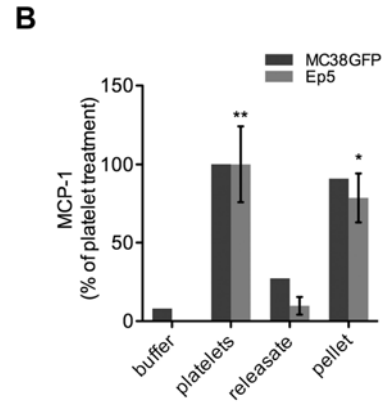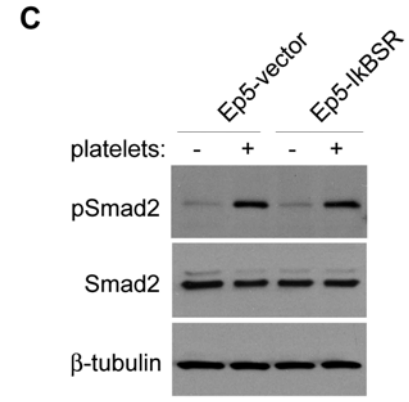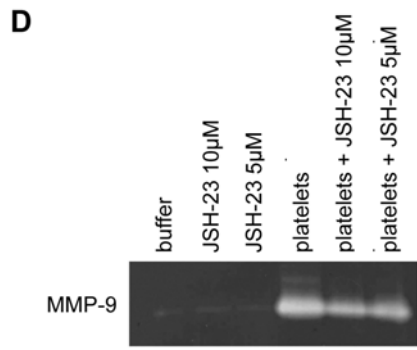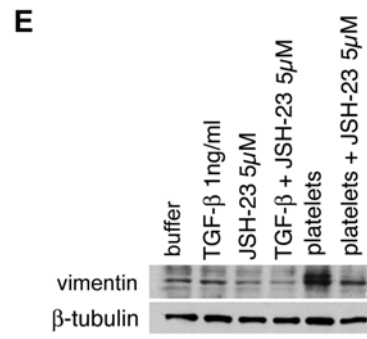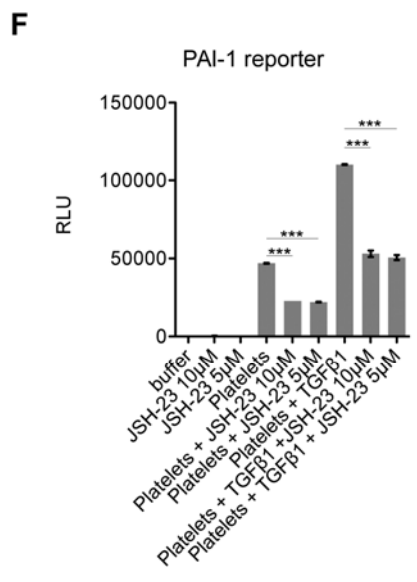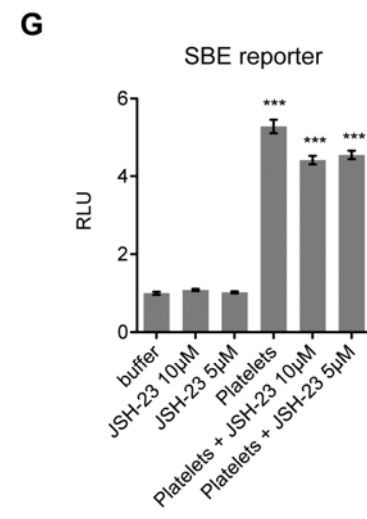

**Figure S4, related to Figure 6. The NF- $\kappa$ B Signaling Pathway Is Activated by Platelets in a Contact-Dependent Manner and Cooperates with TGF $\beta$  Signaling to Induce an EMT-Like Transition**

(A) Ep5 cells were transfected with firefly luciferase reporters of NF- $\kappa$ B or JNK activity and constitutively active control *Renilla* luciferase reporters. 24h after transfection, the cells were treated with buffer, platelets, releasate from activated platelets (releasate), or the pellet fraction from activated platelets (pellet) for 20h, and the relative luciferase activity (RLU) was measured (n=3).

(B) MCP-1 concentration in the conditioned medium from MC38GFP or Ep5 cells incubated with buffer, platelets, releasate from activated platelets (releasate), or the pellet fraction from activated platelets (pellet) for 40h (n=3).

(C) Detection of phospho-Smad2 and total Smad2 protein levels by immunoblotting in Ep5 cells stably expressing an I $\kappa$ B super-repressor (Ep5-I $\kappa$ BSR) or a control vector (Ep5-vector) and treated with buffer or platelets for 40h.  $\beta$ -tubulin is used as loading control.

(D) Zymography for MMP-9 in the conditioned medium from Ep5 cells treated with buffer, platelets, JSH-23, or platelets + JSH-23 for 40h.

(E) Detection of vimentin protein levels by immunoblotting in Ep5 cells treated with buffer, platelets, JSH-23 5  $\mu$ M or platelets + JSH-23 5  $\mu$ M.  $\beta$ -tubulin is used as loading control.

(F) Relative luciferase activity in MLEC cells stably expressing a luciferase reporter under the control of the *PAI-1* promoter construct and treated with buffer, platelets, JSH-23, platelets + JSH-23, or platelets + TGF $\beta$ 1 (1 ng/ml) + JSH-23 for 20h (n=2).

(G) Relative luciferase activity in Ep5 cells stably expressing a luciferase reporter under the control of the SBE promoter and treated with buffer, platelets, JSH-23 or platelets + JSH-23 for 20h (n=2).

For panels A, B, F and G, bars represent the mean  $\pm$  SEM, and \*p<0.05, \*\*p<0.01, \*\*\*p<0.001 vs buffer were determined by one-way ANOVA followed by Tuckey's post test.

## **SUPPLEMENTAL EXPERIMENTAL PROCEDURES**

### **Tissue Culture**

Ep5 (EpRas) cells (obtained from R. Weinberg), MC38GFP cells (obtained from A. Varki), and MLEC cells stably expressing a *PAI-1* promoter-luciferase reporter construct (Abe et al., 1994) were cultivated in DMEM 10% FCS, 1% Penicillin/Streptomycin and 2 mM L-Glutamine.

HMLER cells (H-Ras transformed human mammary epithelial cell line; obtained from R. Weinberg) were cultivated as described previously (Elenbaas et al., 2001). MCF10A cells (Soule et al., 1990) were maintained in DMEM/F12 (50:50) supplemented with 5% horse serum, 10mM HEPES, 10 $\mu$ g/ml insulin, 20ng/ml epidermal growth factor, 0.5 $\mu$ g/ml hydrocortisone, 100ng/ml cholera toxin, 1% Penicillin/Streptomycin.

### **Generation of Cell Lines Stably Expressing ZsGreen and IkBSR Reporters**

Retroviral vectors coding for ZsGreen or IkB $\alpha$  super-repressor and GFP (IkBSR) were transduced in Ep5 cells. Packaging of the vectors was obtained by cotransfection of 293FT cells (ATCC) with 1ng transfer vector, 1 $\mu$ g MLV gag-pol, and 1 $\mu$ g VSVg expression vectors using Fugene6 (Roche) as described previously (Stern et al., 2008). 48h after transfection, 293FT cell-conditioned medium was collected, filtered through a 0.45 $\mu$ m filter, and applied to Ep5 cells with 4 $\mu$ g/ml polybrene (Sigma). Ep5 cells were then selected on the basis of GFP or ZsGreen expression by FACS sorting.

### **Genotyping**

DNA from mouse tail biopsies was amplified by PCR using the primers listed in the table below.



### Genotyping Primers

|                                                                                           |                      |                                                                                   |                      |
|-------------------------------------------------------------------------------------------|----------------------|-----------------------------------------------------------------------------------|----------------------|
| For detection of the <i>Tgfb1</i> flox and WT alleles                                     | forw<br>rev          | 5'CCCAGGCTAGCCTTGAACCTTCT3'<br>5'AGGGGTGGAGATGTAGTTTGG3'                          | (Li et al., 2007)    |
| For simultaneous detection of the <i>Tgfb1</i> null ( <i>egfp</i> knockin) and WT alleles | forw<br>rev1<br>rev2 | 5'CGCATCCCACCTTTGCCGAG3'<br>5'GGCGTCAGCACTAGAAGCCA3'<br>5'GCCGTAGGTCAG GGTGGTCA3' | (Li et al., 2007)    |
| For detection of the <i>Pf4-cre</i> transgene                                             | forw<br>rev          | 5'CCCATACAGCACACCTTTTG3'<br>5'TGCACAGTCAGCAGGTT3'                                 | (Tiedt et al., 2007) |

### In Vivo Metastasis Assays

For lung metastasis assays, cells treated with platelets for 40h were washed in PBS, and either trypsinized (Ep5) or lifted with 2mM EDTA in PBS (MC38GFP). Cells were then rinsed and centrifuged twice to remove platelets, and resuspended in HBSS at a constant number of cells for all mice in a given experiment (250,000 to 1,000,000 cells/injection). 100µl of cell suspension were then injected via the tail vein of syngeneic mice. After 14 days, animals were sacrificed and the numbers of metastatic foci at the surface of lungs were counted under a fluorescence stereomicroscope (Nikon SMZ1500). For 3h and 48h time points, pictures were taken (magnification 3x) and the number of cells/picture was automatically counted with Cell Profiler (Lamprecht et al., 2007). For metastasis experiments with the *Pf4-cre*<sup>+</sup>; *TGFβ1*<sup>fl/fl</sup> mice, untreated MC38GFP cells cultivated in DMEM 10%FCS were lifted and washed as described above and 100µl of a 1x10E7/ml cell suspension were injected via the tail vein.

### RT-qPCR Analysis

RNA was isolated from total cell lysates using RNeasy Mini kit (Qiagen), and reverse-transcribed with TaqMan Reverse Transcription Reagents and random hexameric primers (Applied Biosystems). Human specific PCR primers were designed using Primer3 and BLAST. RT-qPCR was performed with the iQ SYBR Green Supermix (Biorad). Primers used are listed in

the tables below. Data were normalized to *GAPDH* expression. Relative mRNA levels were calculated using the comparative  $C_T$  method.

#### **RT-qPCR Primers used with mouse cells**

|                       |                             |
|-----------------------|-----------------------------|
| Gapdh forw            | 5'CAGTATGACTCCACTCACGGC3'   |
| Gapdh rev             | 5'GAGGGGCCATCCACAGTCTTC3'   |
| Snail forw            | 5'GGAAGCCCAACTATAGCGAGC3'   |
| Snail rev             | 5'CAGTTGAAGATCTTCCGCGAC3'   |
| Fibronectin forw      | 5'CGTAAATTGCCCATTTGAGTG3'   |
| Fibronectin rev       | 5'GAGGGTCTGCTAACATCACTG3'   |
| Serpine1 (PAI-1) forw | 5'CCCGCCTCCTCATCCTGCCT3'    |
| Serpine1 (PAI-1) rev  | 5'GCCACTGTGCCGCTCTCGTT3'    |
| Claudin-1 forw        | 5'GCGTTTCGCAAAGCACCGGG3'    |
| Claudin-1 rev         | 5'GGCTCGGGTTGCCTGCAAAGT3'   |
| Vimentin forw         | 5'AATGCTTCTCTGGCACGTCT3'    |
| Vimentin rev          | 5'GCTCCTGGATCTCTTCATCG3'    |
| Slug forw             | 5'CATCCTTGGGGCGTGTAAGTC3'   |
| Slug Rev              | 5'GCCAGAGAACGTAGAATAGGTC3'  |
| Twist forw            | 5'GGACAAGCTGAGCAAGATTCA3'   |
| Twist rev             | 5'CGGAGAAGGCGTAGCTGAG3'     |
| Zeb1 forw             | 5'CGCCATGAGAAGAACGAGGAC3'   |
| Zeb1 rev              | 5'TGTATGCAAAGGTGTAAGTGCAC3' |
| Zeb2 forw             | 5'CAGGCTCGGAGACAGATGAAG3'   |
| Zeb2 rev              | 5'CTTGCAAGAATCTCGCCACTG3'   |
| Ctgf forw             | 5'CTCCACCCGAGTTACCAATG3'    |
| Ctgf rev              | 5'TGGCGATTTTAGGTGTCC3'      |
| Edn1 forw             | 5'TTTCCCGTGATCTTCTCTCTGC3'  |
| Edn1 rev              | 5'CTGAGTTCGGCTCCCAAGAC3'    |
| Jag1 forw             | 5'TTCAGTTTCGCCTGGCCGAG3'    |
| Jag1 rev              | 5'TCAGTGTCTGCCATTGCCGG3'    |
| Vegfa forw            | 5'CTTGTTTCAGAGCGGAGAAAGC3'  |
| Vegfa rev             | 5'ACATCTGCAAGTACGTTTCGTT3'  |

#### **RT-qPCR Primers used with human cells**

|                  |                            |
|------------------|----------------------------|
| GAPDH forw       | 5'GGTCTCCTCTGACTTCAACA3'   |
| GAPDH rev        | 5'GTGAGGGTCTCTCTTCTCCT3'   |
| Snail forw       | 5'TCGGAAGCCTAACTACAGCGA3'  |
| Snail rev        | 5'AGATGAGCATTGGCAGCGAG3'   |
| Fibronectin forw | 5'CCATCGCAAACCGCTGCCAT3'   |
| Fibronectin rev  | 5'AACACTTCTCAGCTATGGGCTT3' |
| Serpine1 forw    | 5'ACCGCAACGTGGTTTTCTCA3'   |

|                 |                             |
|-----------------|-----------------------------|
| Serpine1 rev    | 5'TTGAATCCCATAGCTGCTTGAAT3' |
| N-cadherin forw | 5'ATCCTACTGGACGGTTCG3'      |
| N-cadherin rev  | 5'TTGGCTAATGGCACTTGA3'      |
| Vimentin forw   | 5'GAACGCCAGATGCGTGAAATG3'   |
| Vimentin rev    | 5'CCAGAGGGAGTGAATCCAGATTA3' |
| Slug forw       | 5'AAGCATTTC AACGCCTCCAAA3'  |
| Slug Rev        | 5'GGATCTCTGGTTGTGGTATGACA3' |
| Twist forw      | 5'CCGGAGACCTAGATGTCATTG3'   |
| Twist rev       | 5'CCACGCCCTGTTTCTTTG3'      |
| Zeb1 forw       | 5'GATGATGAATGCGAGTCAGATGC3' |
| Zeb1 rev        | 5'ACAGCAGTGTCTTGTTGTTGT3'   |
| Zeb2 forw       | 5'GGAGACGAGTCCAGCTAGTGT3'   |
| Zeb2 rev        | 5'CCACTCCACCCTCCCTTATTTC3'  |

### Zymography

Conditioned media from cells treated for 48h were collected and centrifuged to remove cellular debris and platelets. Volumes of conditioned media normalized to the number of cells were then mixed with 2X Laemmli sample buffer (BioRad) and loaded onto a 7.5% acrylamide/bisacrylamide separating gel containing 0.2% (w/v) gelatin. After electrophoresis, the gel was incubated in 2.5% Triton X-100, rinsed in distilled water and incubated at 37°C in buffer containing 50mM Tris pH 7.6, 20mM NaCl, 5mM CaCl<sub>2</sub>. Finally, the gel was stained in 0.1% Coomassie blue R-250, 30% methanol, 10% acetic acid, and destained in the same solution without the Coomassie blue dye.

### Immunoblotting

Immunoblot analysis was performed as described previously (Labelle et al., 2008). The primary antibodies were anti-β-tubulin (Sigma), anti E-cadherin (BD Biosciences), anti-Smad2/3, anti-phosphoSmad2 (Cell Signaling Technology) and anti-vimentin (Sigma). The secondary antibodies were horseradish peroxidase-conjugated anti-rabbit or anti-mouse IgG (Jackson

Immunoresearch).

### **Invasion Assay**

Invasion assays were performed in 24-well BD Biocoat<sup>TM</sup> Matrigel<sup>TM</sup> Invasion Chambers (8  $\mu$ m pore size; BD Biosciences). 50,000 cells were plated in transwell inserts and either left untreated, treated with SB431542 (10  $\mu$ M), anti-TGF $\beta$ 1 blocking antibody (6 $\mu$ g/ml) or the different platelet fractions. Both upper and lower chambers contained DMEM. After 48h, cells remaining in the upper part of the transwell were removed with a cotton swab. Migrated cells were then stained with Crystal Violet 0.5% and the total number of cells was counted with a Zeiss Axiovert 200 microscope.

### **Immunofluorescence Staining**

For visualization of blood vessels and quantification of extravasation, lungs were fixed by tracheal perfusion with PBS, 4% formaldehyde, 0.3% Triton X-100 for 15 min and removed en bloc. Lung lobes were then cut in 4 pieces, washed in PBS, 0.3% triton X-100 and blocked in PBS 10% normal goat serum followed by the primary antibody (anti-PECAM-1, BD Biosciences). After washing, samples were incubated with Alexa 594-conjugated goat anti-rat IgG (Molecular probes) and DAPI. Images of lobe pieces from 3 or more mice per group were taken at 60X with Z-sections every 1 $\mu$ m on an Olympus FV10i inverted confocal microscope. 3D rendering and XYZ views were generated with Volocity (Perkin Elmer). XYZ views were then examined and cells clearly within blood vessels (directly surrounded by PECAM-1 staining; red) were scored as intravascular, while cells outside blood vessels were scored as extravascular.

For platelet immunostaining in lungs, 20  $\mu$ m-thick sections were fixed in acetone and stained

with anti-GP1b $\beta$  (Emfret). The secondary antibody was Alexa 594-conjugated goat anti-rat IgG (Molecular Probes). Images were taken at 60X with Z-sections every 1 $\mu$ m on an Olympus FV10i inverted confocal microscope.

For platelet immunostaining in cell suspensions, cells were prepared as for *in vivo* metastasis assays. The suspensions were then stained with anti-CD41 (BD Biosciences), washed once with PBS and incubated with Alexa 594-conjugated goat anti-rat IgG (Molecular probes). After a final wash in PBS, cells were resuspended in PBS and 5 $\mu$ l of cell suspensions were loaded on a microscope slide.

For immunostaining of tumor cells in tissue culture, cells were rinsed with PBS, fixed with 4% formaldehyde and stained with anti-E-cadherin or anti-N-cadherin (BD Biosciences). The secondary antibody was Alexa 594-conjugated goat anti-rat IgG (Molecular probes). Images were taken with a Zeiss LSM510 microscope.

### **Tail Bleeding Assay**

For tail bleeding assays, mice were anesthetized with 2.5% isoflurane in oxygen. The tail was cut at 5mm and bled onto a Whatman filter paper. The filter paper was dabbed to the wound every 30 seconds without disrupting the forming clot. The experiment was continued until bleeding stopped completely.

### **Microarray Analysis**

For data presented in Fig. S3 and Table S4, total RNA was isolated from Ep5 cells treated with buffer, platelets, platelet pellet or platelet releasate (n=3). Samples were then processed with

the Nugen Applause® WT-Amp Plus ST System and hybridized on Affymetrix Mouse Gene 1.0 ST arrays, according to manufacturer's instructions (Affymetrix).

Data are deposited in Gene Expression Omnibus (GEO) under accession number GSE27456.

### **Gene Set Enrichment Analysis (GSEA)**

GSEA was performed using GSEA v2.07 ([www.broadinstitute.org/gsea](http://www.broadinstitute.org/gsea); Mootha et al., 2003; Subramanian et al., 2005). The signal-to-noise metric and permutation of gene sets were used to rank the genes and calculate nominal p-values and FDR. Probe sets were collapsed to unique gene symbols and used to interrogate the gene sets from the literature listed in the table below, some of which were provided by the Molecular Signatures Database (MSigDB; [www.broadinstitute.org/gsea/msigdb](http://www.broadinstitute.org/gsea/msigdb)).

| <b>Gene set</b>                       | <b>Source</b>                      |
|---------------------------------------|------------------------------------|
| BLICK_EMT-SIG                         | (Blick et al.)                     |
| TAUBE_EMT                             | (Taube et al.)                     |
| ONDER_CDH1_TARGETS_2                  | MSigDB, (Onder et al., 2008)       |
| GIAMPIERI_TGFB                        | (Giampieri et al., 2009)           |
| VALCOURT_TGFB                         | (Valcourt et al., 2005)            |
| HINATA_NFKB_TARGETS_KERATINOCYTE      | MSigDB, (Hinata et al., 2003)      |
| SANA_TNF_SIGNALING                    | MSigDB, (Sana et al., 2005)        |
| CREIGHTON_CSC                         | (Creighton et al., 2009)           |
| VANTVEER_BREAST_CANCER_POOR_PROGNOSIS | MSigDB, (van 't Veer et al., 2002) |
| JAEGER_METASTASIS                     | MSigDB, (Jaeger et al., 2007)      |

## SUPPLEMENTAL REFERENCES

Blick, T., Hugo, H., Widodo, E., Waltham, M., Pinto, C., Mani, S.A., Weinberg, R.A., Neve, R.M., Lenburg, M.E., and Thompson, E.W. Epithelial mesenchymal transition traits in human breast cancer cell lines parallel the CD44(hi)/CD24 (lo/-) stem cell phenotype in human breast cancer. *J Mammary Gland Biol Neoplasia* 15, 235-252.

Creighton, C.J., Li, X., Landis, M., Dixon, J.M., Neumeister, V.M., Sjolund, A., Rimm, D.L., Wong, H., Rodriguez, A., Herschkowitz, J.I., *et al.* (2009). Residual breast cancers after conventional therapy display mesenchymal as well as tumor-initiating features. *Proc Natl Acad Sci U S A* 106, 13820-13825.

Elenbaas, B., Spirio, L., Koerner, F., Fleming, M.D., Zimonjic, D.B., Donaher, J.L., Popescu, N.C., Hahn, W.C., and Weinberg, R.A. (2001). Human breast cancer cells generated by oncogenic transformation of primary mammary epithelial cells. *Genes Dev* 15, 50-65.

Hinata, K., Gervin, A.M., Jennifer Zhang, Y., and Khavari, P.A. (2003). Divergent gene regulation and growth effects by NF-kappa B in epithelial and mesenchymal cells of human skin. *Oncogene* 22, 1955-1964.

Jaeger, J., Koczan, D., Thiesen, H.J., Ibrahim, S.M., Gross, G., Spang, R., and Kunz, M. (2007). Gene expression signatures for tumor progression, tumor subtype, and tumor thickness in laser-microdissected melanoma tissues. *Clin Cancer Res* 13, 806-815.

Lamprecht, M.R., Sabatini, D.M., and Carpenter, A.E. (2007). CellProfiler: free, versatile software for automated biological image analysis. *Biotechniques* 42, 71-75.

Mootha, V.K., Lindgren, C.M., Eriksson, K.F., Subramanian, A., Sihag, S., Lehar, J., Puigserver, P., Carlsson, E., Ridderstrale, M., Laurila, E., *et al.* (2003). PGC-1alpha-responsive genes involved in oxidative phosphorylation are coordinately downregulated in human diabetes. *Nat Genet* 34, 267-273.

Onder, T.T., Gupta, P.B., Mani, S.A., Yang, J., Lander, E.S., and Weinberg, R.A. (2008). Loss of E-cadherin promotes metastasis via multiple downstream transcriptional pathways. *Cancer Res* 68, 3645-3654.

Sana, T.R., Janatpour, M.J., Sathe, M., McEvoy, L.M., and McClanahan, T.K. (2005). Microarray analysis of primary endothelial cells challenged with different inflammatory and immune cytokines. *Cytokine* 29, 256-269.

Soule, H.D., Maloney, T.M., Wolman, S.R., Peterson, W.D., Jr., Brenz, R., McGrath, C.M., Russo, J., Pauley, R.J., Jones, R.F., and Brooks, S.C. (1990). Isolation and characterization of a spontaneously immortalized human breast epithelial cell line, MCF-10. *Cancer Res* 50, 6075-6086.

Subramanian, A., Tamayo, P., Mootha, V.K., Mukherjee, S., Ebert, B.L., Gillette, M.A., Paulovich, A., Pomeroy, S.L., Golub, T.R., Lander, E.S., *et al.* (2005). Gene set enrichment

analysis: a knowledge-based approach for interpreting genome-wide expression profiles. *Proc Natl Acad Sci U S A* *102*, 15545-15550.

Taube, J.H., Herschkowitz, J.I., Komurov, K., Zhou, A.Y., Gupta, S., Yang, J., Hartwell, K., Onder, T.T., Gupta, P.B., Evans, K.W., *et al.* Core epithelial-to-mesenchymal transition interactome gene-expression signature is associated with claudin-low and metaplastic breast cancer subtypes. *Proc Natl Acad Sci U S A* *107*, 15449-15454.

Valcourt, U., Kowanetz, M., Niimi, H., Heldin, C.H., and Moustakas, A. (2005). TGF-beta and the Smad signaling pathway support transcriptomic reprogramming during epithelial-mesenchymal cell transition. *Mol Biol Cell* *16*, 1987-2002.

van 't Veer, L.J., Dai, H., van de Vijver, M.J., He, Y.D., Hart, A.A., Mao, M., Peterse, H.L., van der Kooy, K., Marton, M.J., Witteveen, A.T., *et al.* (2002). Gene expression profiling predicts clinical outcome of breast cancer. *Nature* *415*, 530-536.
